# Supplementary material for: FOXC2 expression and epithelial–mesenchymal phenotypes are associated with castration resistance, metastasis and survival in prostate cancer
Source: PubMed Central journal article supplement (PMC6817834; doi:10.1002/cjp2.142), 2019-10-01
Supplement: CJP2-5-272-s001.pdf [file CJP2-5-272-s001.pdf]

**FOXC2 expression and epithelial-mesenchymal phenotypes are associated with castration resistance, metastasis and survival in prostate cancer**

Børretzen A *et al J Pathol Clin Res*, DOI 10.1002/cjp2.142

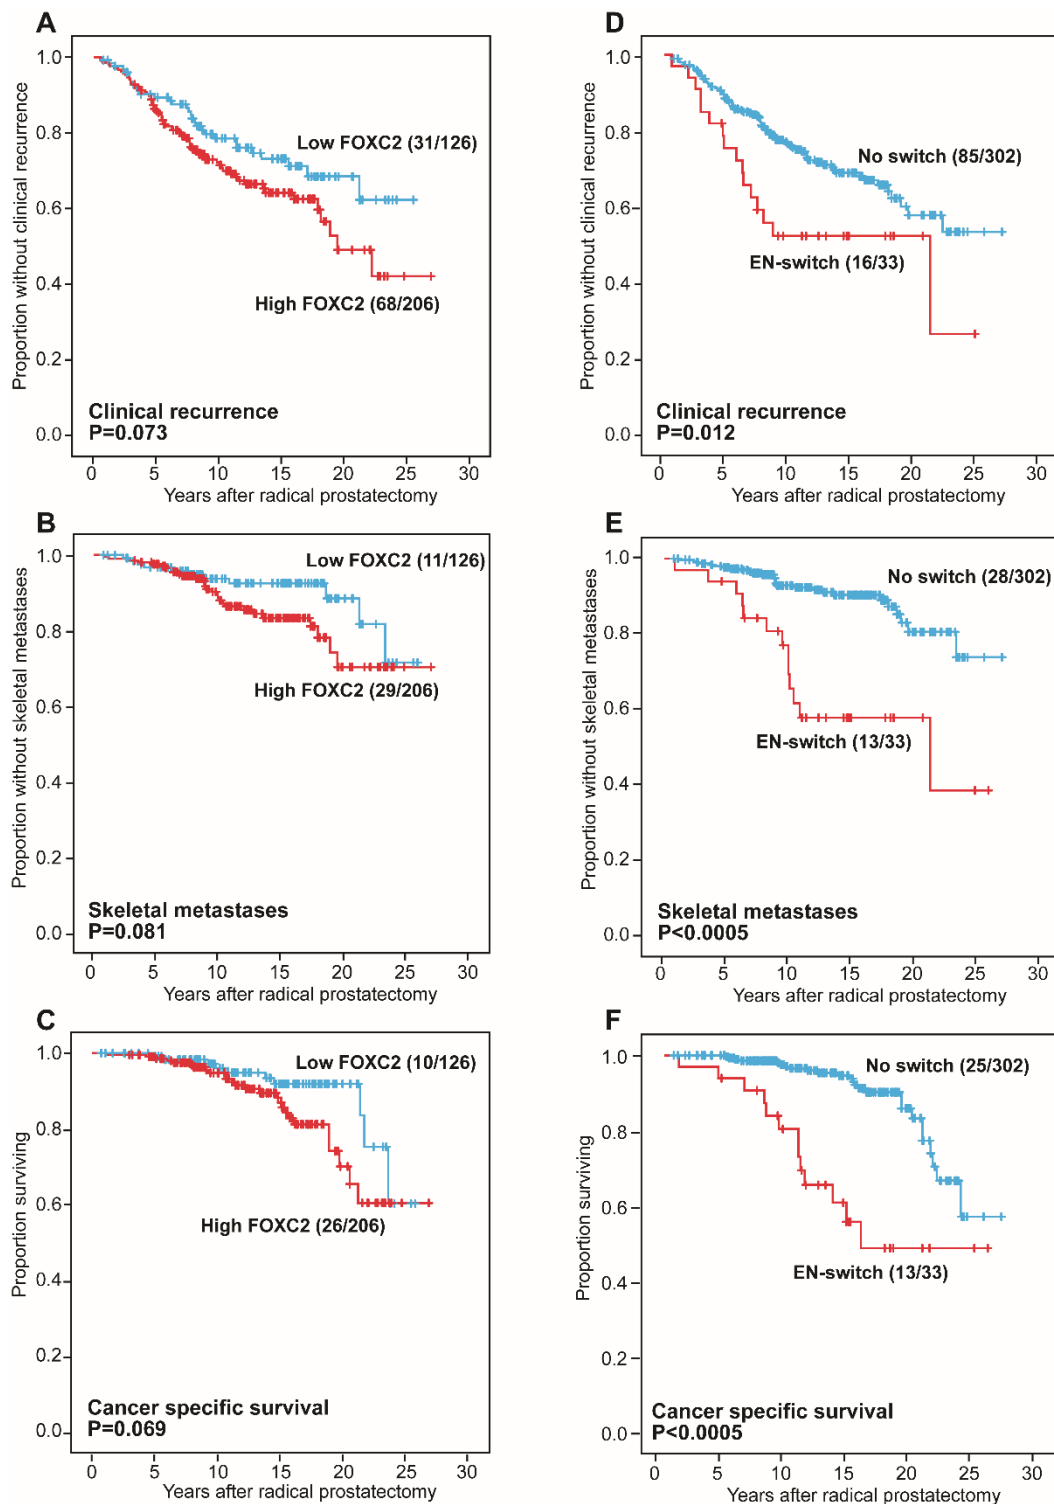

**Figure S1.** Univariate survival analyses (Kaplan-Meier) in 338 prostate cancer patients of all Gleason scores after radical prostatectomy, by (A-C) cytoplasmic FOXC2 and (D-F) EN-switch, with clinical recurrence, skeletal metastases and cancer specific death as end-points.
